# Supplementary material
Source: PubMed Central journal article supplement (PMC3000994)
Supplement: supp_M110.156729_jbc.M110.156729-1.pdf [file supp_M110.156729_jbc.M110.156729-1.pdf]

**Borza et al.**

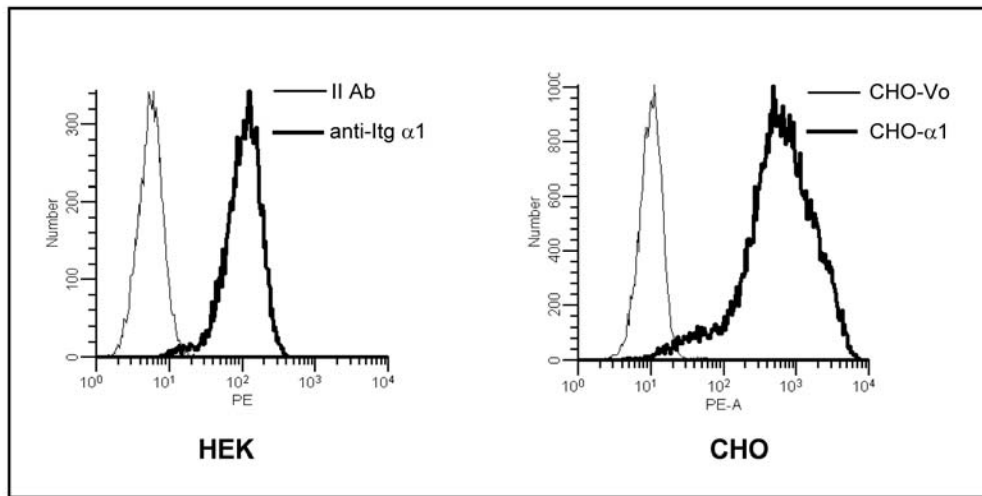

**Supplemental Figure 1**

FACS analysis of HEK and CHO cells. HEK or CHO either expressing (CHO- $\alpha$ 1) or not (CHO-Vo) the human integrin  $\alpha$ 1 subunit were analyzed by FACS with anti-human integrin  $\alpha$ 1 antibody to evaluate surface expression of integrin  $\alpha$ 1 $\beta$ 1.

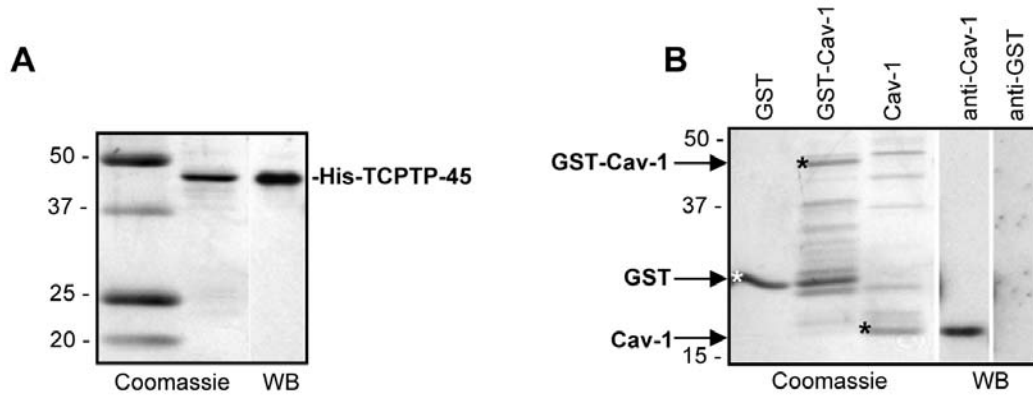

**Supplemental Figure 2**

**(A, B)** Coomassie and western blot analysis showing purified His-tagged full length TCPTP (His-TCPTP-45) **(A)** and GST-cleaved Cav-1 **(B)**.

Borza et al.

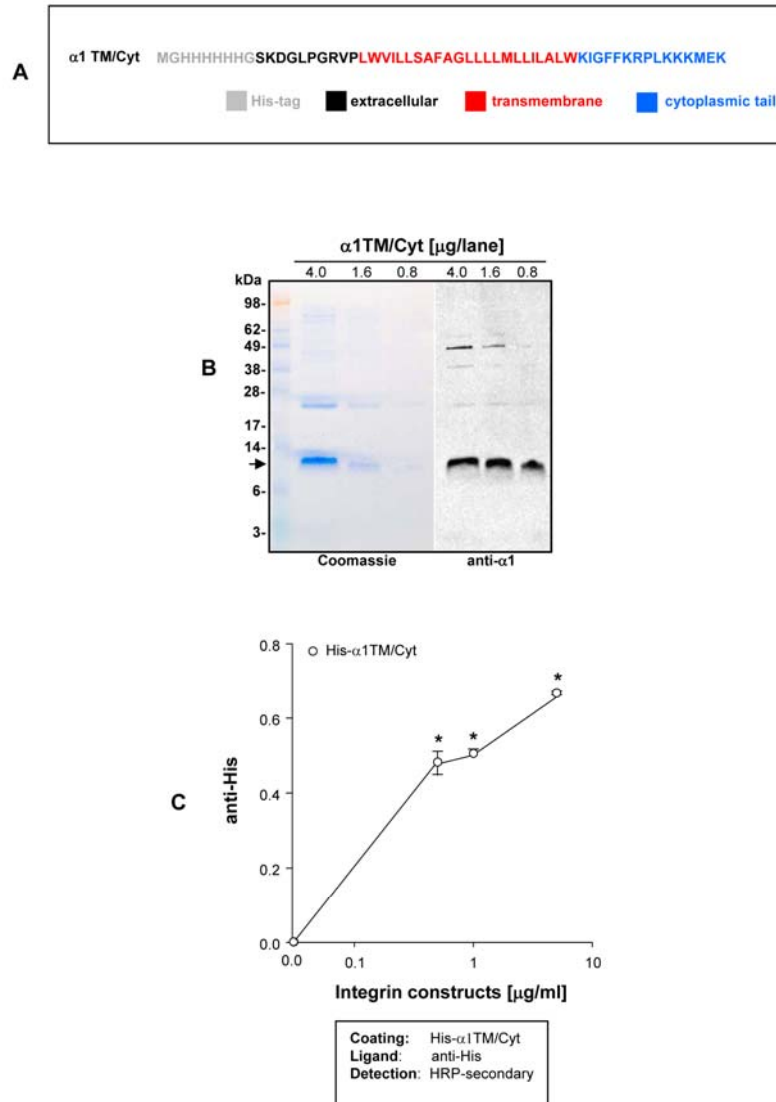

### Supplemental Figure 3

(A) Schematic representation of the His-tagged integrin  $\alpha 1$  TM/Cyt construct used in ELISA assays. (B) *Left*: Coomassie of purified His-tagged  $\alpha 1$  TM/Cyt constructs run under non-denaturing conditions. *Right*: Western blot of purified His-tagged  $\alpha 1$  TM/Cyt constructs run under non-denaturing conditions and detected using anti-human integrin  $\alpha 1$  cytoplasmic tail antibodies. The arrow indicates monomeric forms of this construct. (C) His-tagged  $\alpha 1$  TM/Cyt was coated at the indicated concentration and immobilized constructs were detected with anti-His antibodies. One representative experiment performed in triplicates is shown. Three independent experiments were performed with similar results. (\*) indicates significant differences ( $p < 0.05$ ) between uncoated vs. coated wells.

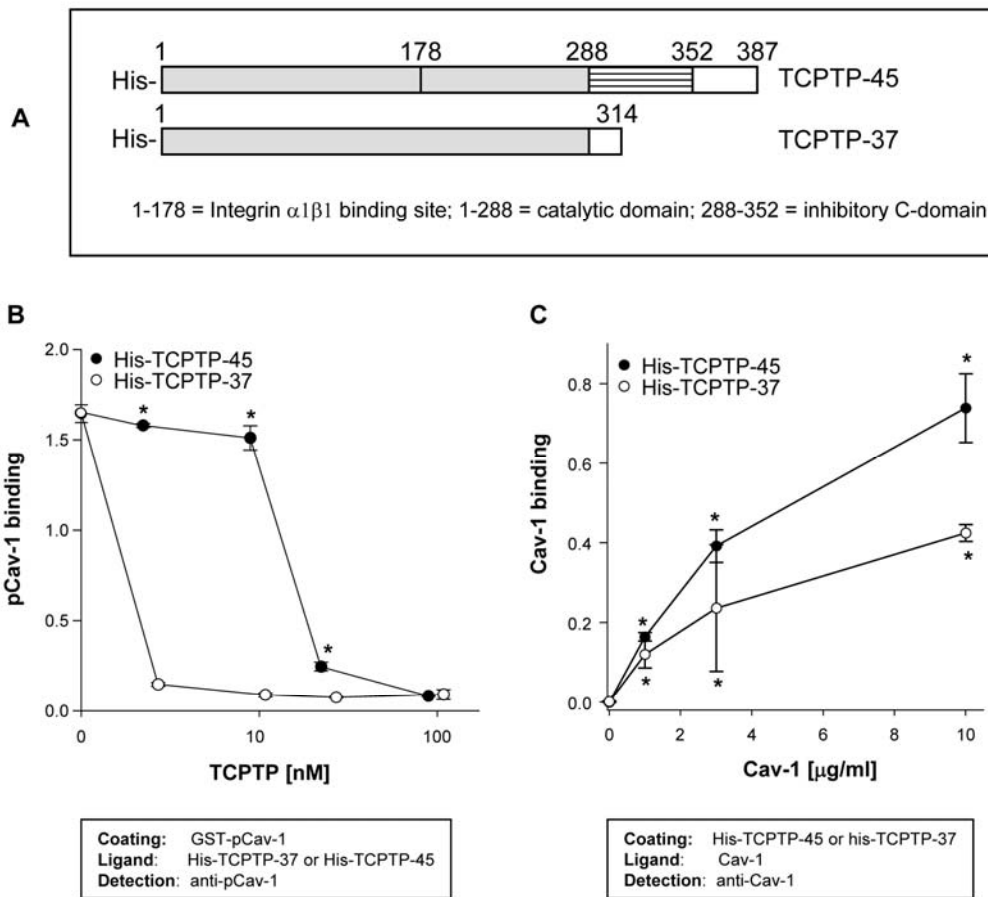

#### Supplemental Figure 4

(A) Schematic representation of full length (TCPTP-45) and constitutively active (TCPTP-37) TCPTP indicating the integrin  $\alpha 1$  binding site, the catalytic domain, and the inhibitory C-terminus domain. (B) Immobilized pCav-1 (5  $\mu$ g/ml) was incubated with increasing nM concentrations of His-TCPTP-45 or His-TCPTP-37 followed by incubation with anti-pCav-1 antibodies. One representative experiment performed in triplicates is shown. Two experiments were performed with similar results. (\*) is as in Fig. 6A. (C) Immobilized full length (TCPTP-45) or constitutively active (TCPTP-37) His-TCPTP (2  $\mu$ g/ml) was incubated with increasing amounts of purified Cav-1 and bound Cav-1 was detected with anti-Cav-1 antibodies. One representative experiment performed in triplicates is shown. Two independent experiments were performed with similar results. (\*) indicates significant difference ( $p < 0.05$ ) between uncoated vs. coated wells.
